# Supplementary material for: A publicly available virtual cohort of four-chamber heart meshes for cardiac electro-mechanics simulations
Source: PubMed Central journal article supplement (PMC7319311; doi:10.1371/journal.pone.0235145), 2020-06-26

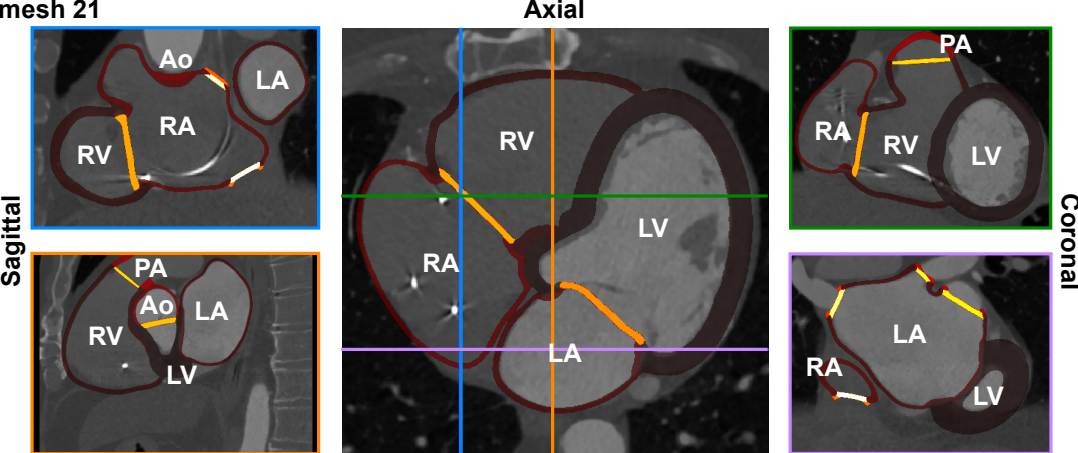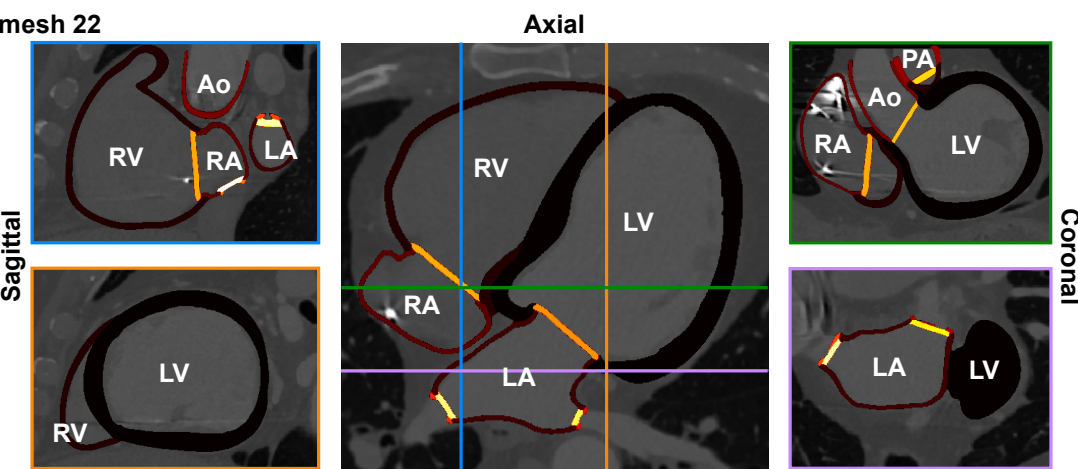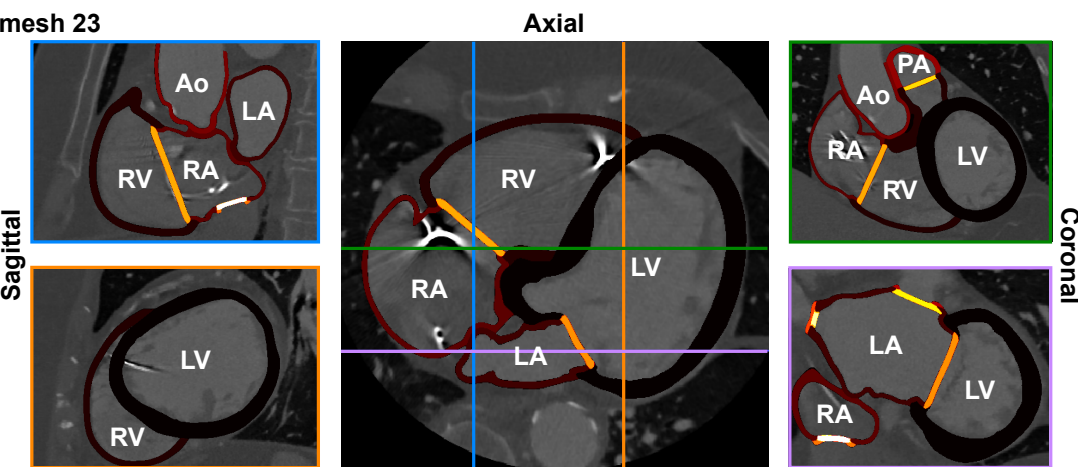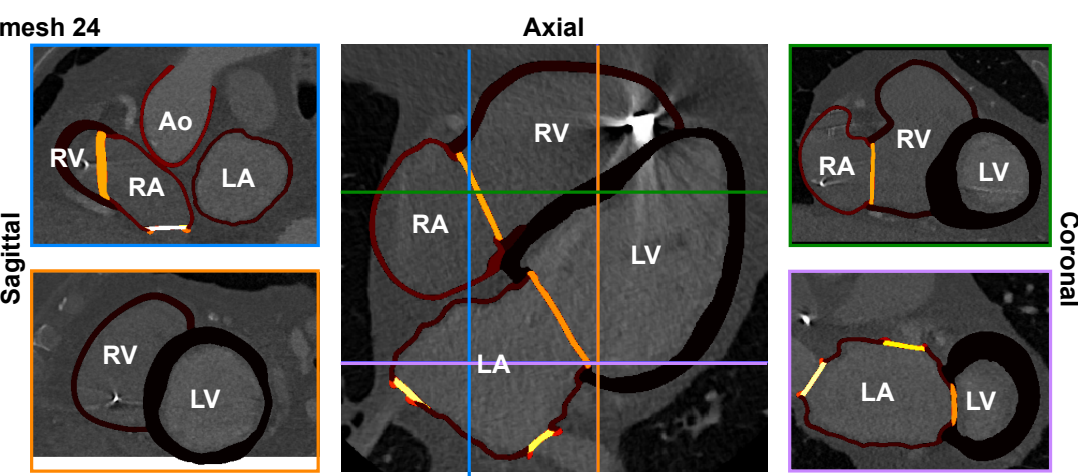

Supplement: pone.0235145.s006.pdf [file pone.0235145.s006.pdf]
